# Supplementary material for: Genetic Variation and Sensory Perception of a Pediatric Formulation of Ibuprofen: Can a Medicine Taste Too Good for Some?
Source: MDPI journal article supplement (doi:10.3390/ijms241713050), 2023-08-22

## SUPPLEMENTARY MATERIALS

**Supplementary Figure S1. Scatter plots of the first two principal components (PC1, PC2) of genetic ancestry for 1000 Genomes Project subjects and study participants.** The 1000 Genomes Project subjects ( $n = 2,504$ ) were labeled within five super-populations: African, European, East Asian, South Asian, and American. The study participants included in the genetic ancestry analysis ( $n = 141$ ) were labeled with their genetic ancestry: African ( $n = 63$ ), European ( $n = 51$ ), South Asian ( $n = 13$ ), East Asian ( $n = 7$ ), or American ( $n = 7$ ). Each data point represents one panelist.

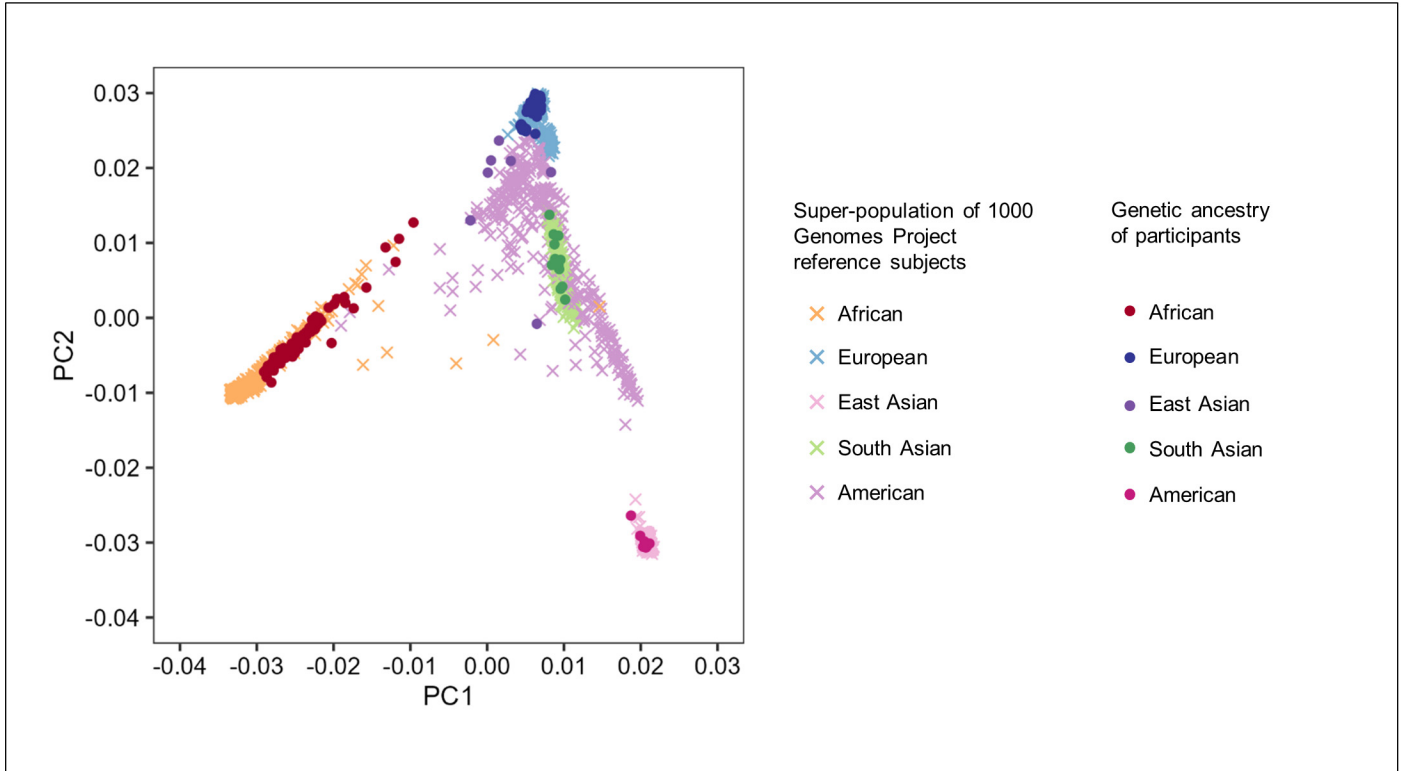

**Figure S2. Relationship between panelists' first two principal components of genetic ancestry and their irritation, sweetness and hedonic ratings of Motrin™.** Scatter plots of the first two principal components (PC1, PC2) and irritation (A-B), sweetness (C-D), and hedonic (E-F) gLMS ratings after swallowing Motrin™. Each data point represents one panelist ( $n = 141$ ) labeled by their genetic ancestry: African ( $n = 63$ ), European ( $n = 51$ ), South Asian ( $n = 13$ ), East Asian ( $n = 7$ ), or American ( $n = 7$ ). Because irritation ratings were not normally distributed, square root transformation was applied prior to analysis; however, original gLMS data are plotted to preserve the integrity of the meaning of the scale.  $P$  values were computed using linear regression between PC1 or PC2 and specified gLMS rating. Predicted gLMS ratings from linear regressions are indicated with a solid black line and the 95% confidence interval is indicated by the grey area.

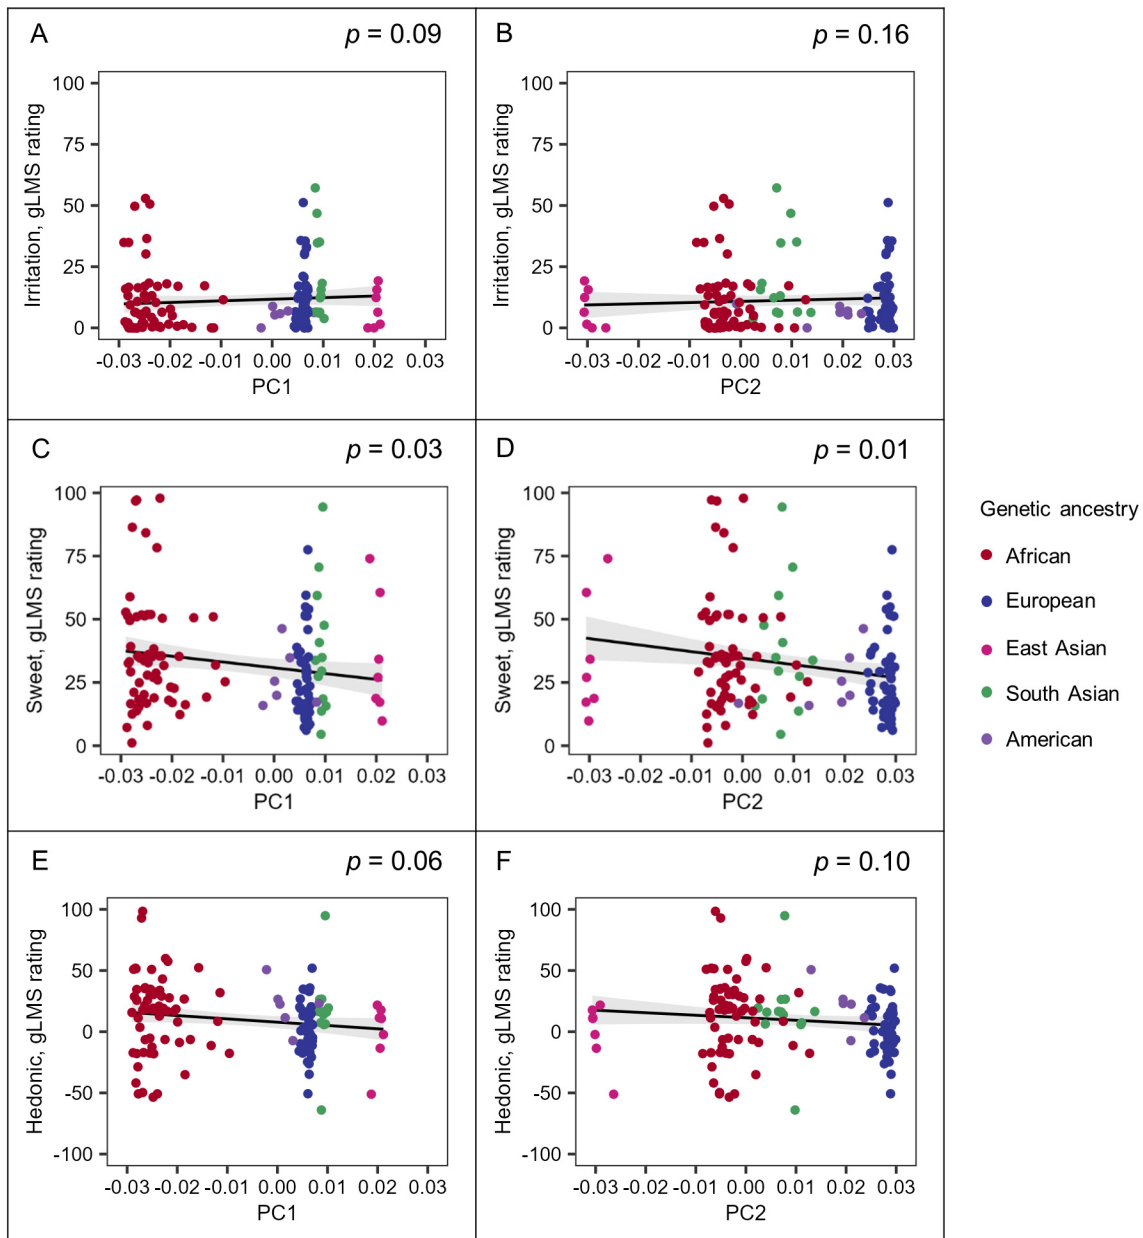

**Figure S3. Relationship between the panelists' first two principal components of genetic ancestry and whether they experienced specific chemesthetic sensations.** Boxplots of the first two principal components (PC1, PC2) of genetic ancestry of study participants and whether they experienced the urge cough or scratch ( $n = 63$ ) or not ( $n = 78$ ) (A-B) or whether they experienced tingling in throat ( $n = 49$ ) or not ( $n = 92$ ) (C-D) after swallowing Motrin™. Boxplots show the median value at the center line, the box spans the inter-quartile range, and the whiskers span the minimum and maximum (without outliers). Each data point represents one panelist ( $n = 141$ ) labeled by their genetic ancestry: African ( $n = 63$ ), European ( $n = 51$ ), South Asian ( $n = 13$ ), East Asian ( $n = 7$ ), or American ( $n = 7$ ).  $P$  values were computed using logistic regression between PC1 or PC2 and each chemosensory phenotype.

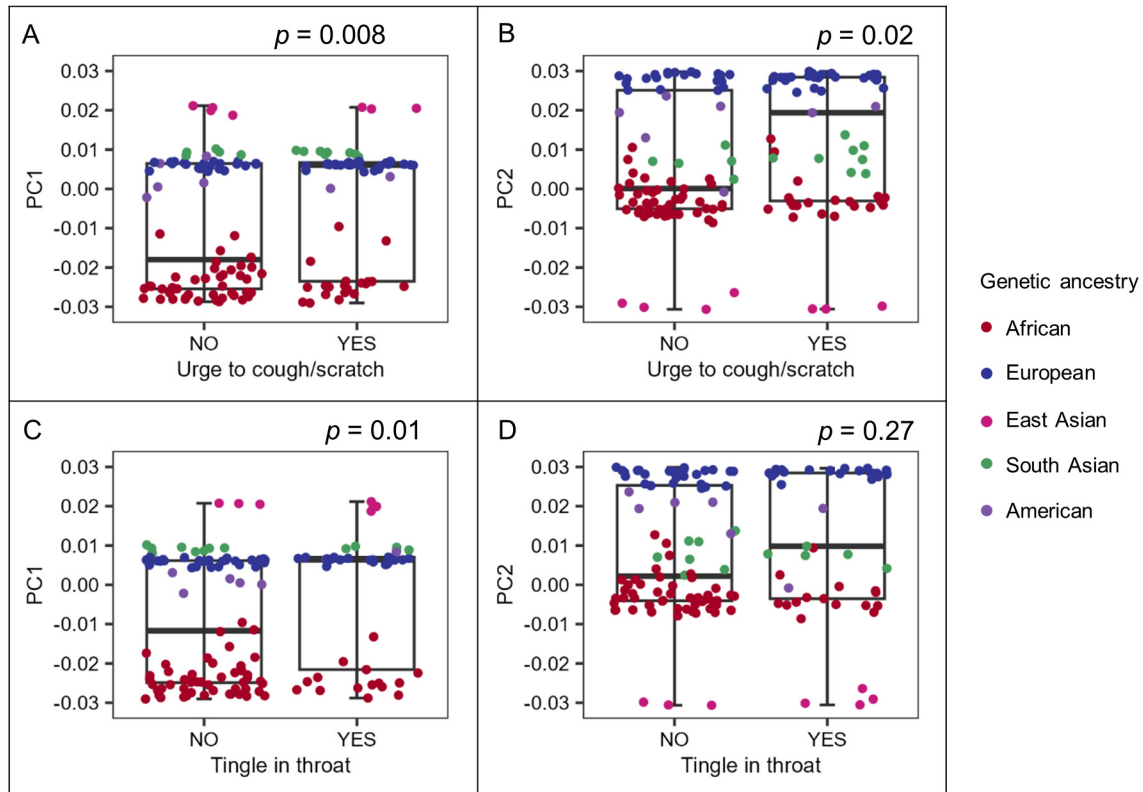

Supplement: s1 [file s1]
